# Supplementary material
Source: Springer Nature journal article supplement (https://www.springermedizin.de/resource/supplementary/12888_2012_1357_MOESM3_ESM.pdf/9479902)
Supplement: MOESM3 [file 9479902]

Use PHQ-9 for baseline score

STEP 1: First 2 weeks Duloxetine/  
placebo 1dd30 mg

STEP 2: 2 weeks after STEP 1  
Duloxetine/placebo 1dd60 mg

YES

Has the PHQ-9 score  
decreased with 5 points OR is  
the total score 5 or lower?

NO

STEP 3: Duloxetine/placebo 1dd90  
mg

YES

Has the PHQ-9 score  
decreased with 5 points OR is the total score  
5 or lower?

NO

Dose stays 1dd90mg!

STEP 4: 12 weeks after session 1:  
Has the score of de PHQ  
decreased with 50% in  
comparison with session 1?

YES

Did the patient receive  
duloxetine or placebo?

Duloxetine

Placebo

Continue current dose  
for 6 months, then the  
phase out period can  
start

Placebo can be  
stopped.

NO

Did the patient receive  
duloxetine or placebo?

Duloxetine

Placebo

Phase out duloxetine and  
cross with Amitriptyline  
according to STEP 5

Begin at STEP 1 of  
this algorithm, but now  
with duloxetine

STEP 5: Amitriptyline retard  
1dd50 mg, titrate through  
1dd100 mg to 1dd150 mg.
